# Supplementary material
Source: publisher site journal article supplement (https://www.dovepress.com/article/223402)
Supplement: Supplementary file 1 [file get_supplementary_file.php]

|  |  | Asthma Biologic – Awareness & Avoidance Handout |
| --- | --- | --- |
|  | | |

**What is an asthma biologic medication?**

- An asthma biologic medication is a medication that targets specific inflammatory molecules that lead to inflammation and worsen asthma symptoms.
  - Some examples of asthma biologic therapy are: Omalizumab (Xolair), Reslizumab (Cinqair), Mepolizumab (Nucala), Benralizumab (Fasenra), Dupilumab (Dupixent)

**What are the side effects that can happen by starting an asthma biologic medication?1-4**

- The use of asthma biologic medications overall is very safe.
- Common side effects that should have already been discussed with your health care provider (i.e., injection site reactions, sore throat, headaches and sore throat).
- Although rare, other more severe reactions that can occur are hypersensitivity reactions, anaphylaxis and parasitic infections.
- Examples of parasitic infections are: Giardia, Strongyloides, Schistosoma, Ascaris, head lice, Austrobilharzia variglandis and Nassarius obsoletus (swimmers’ itch), pinworm, scabies, and Entameoba histolytica.5-10

**Things that can increase your risk of getting a parasitic infection while being on an asthma biologic5:**

- Personal history of a parasitic infection
- Living with or physical contact with someone who has or had a documented parasitic infection
- Travel to 3rd world countries or tropical areas without proper water treatment (ex. India, Malaysia, and most of Central and South America and Africa)
- Drinking water from improperly treated lakes, streams, or wells
- Eating uncooked meat (or any food that may have come in contact with the parasite)
- Children in childcare settings (daycare)
- Institutionalized persons
- Walking barefoot on soil in warm/moist environments
- Men who have sex with men

**Signs/Symptoms that could be related to a parasitic infection while on an asthma biologic:5-10**

- Fever over 101°F or 38.3°C - Diarrhea
- Bloody or greasy stool - Abdominal pain/cramping
- Chills - Muscle aches
- Rash - Itching
- Problems passing urine - Bloody urine

Contact your health care provider for questions or concerns while being on an asthma biologic.

**Disclaimer:** There is a lack of long-term studies on patients with the new biologics, some of which are more worrisome for parasitic infections (i.e. Anti-IL, Anti-IL5R), this handout is adapted from the Center for Disease Control on the prevention of parasitic infections.
